# Supplementary material for: A dormant TIL phenotype defines non-small cell lung carcinomas sensitive to immune checkpoint blockers
Source: PubMed Central journal article supplement (PMC6086912; doi:10.1038/s41467-018-05032-8), 2018-08-10
Supplement: 41467_2018_5032_MOESM1_ESM.pdf [file 41467_2018_5032_MOESM1_ESM.pdf]

**Title: A dormant TIL phenotype defines non-small cell lung carcinomas (NSCLCs) sensitive to immune checkpoint blockers.**

**Gettinger et al.**

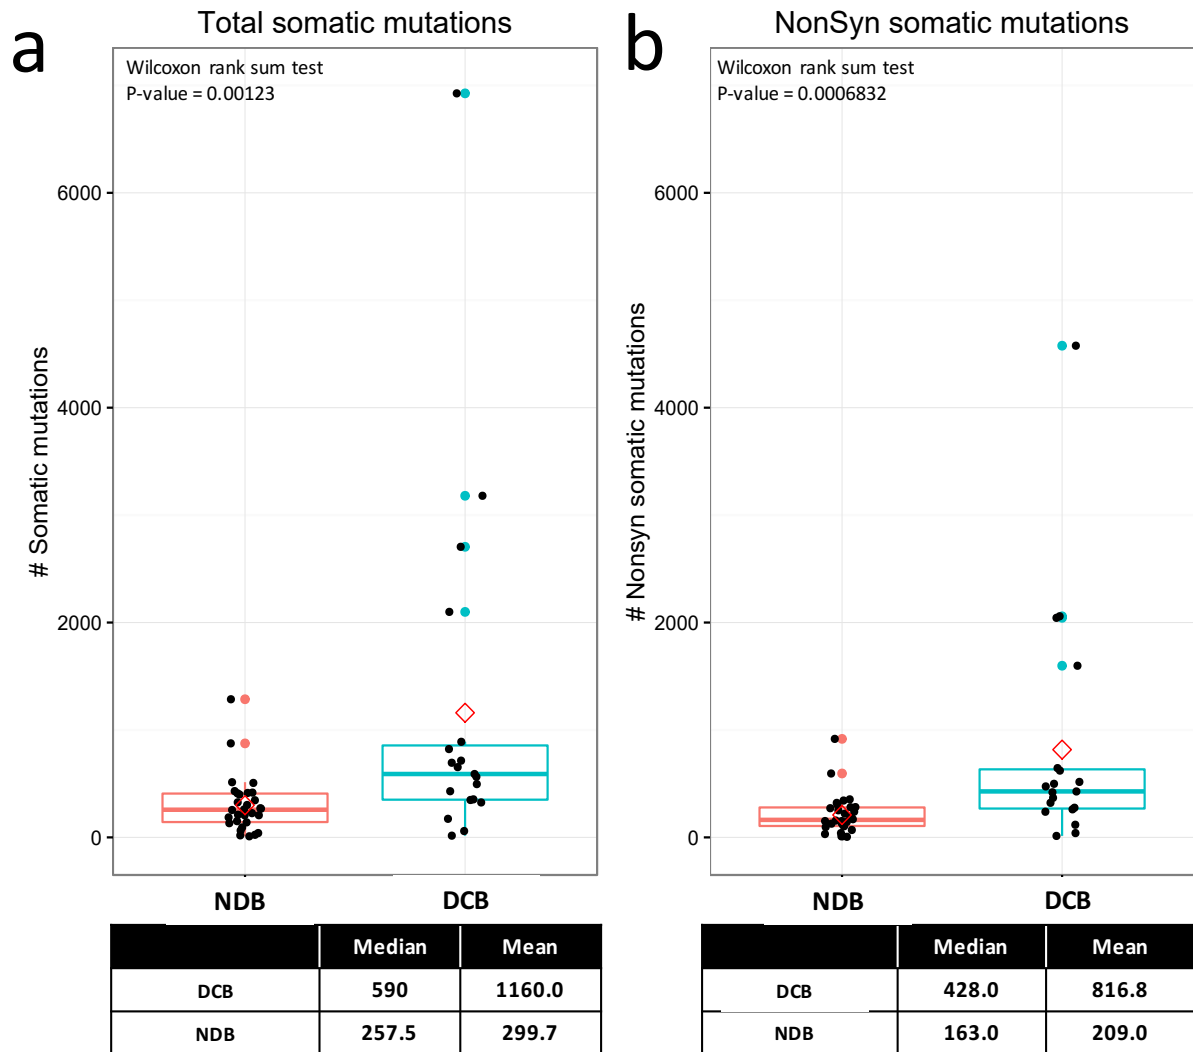

**Supplementary Figure 1. Association between total somatic mutations, nonsynonymous mutations and response to immune checkpoint blockers in NSCLC.** a-b) Box plots showing the number of total mutations (a) or nonsynonymous mutations (b) stratified by cases with no durable benefit (NDB) and with durable clinical benefit (DCB) in the NSCLC cohort. Boxes indicate the 25-75% scores and diamonds indicate mean values. Colored dots indicate outlier values and black dots indicate all the scores in the cohort. Tables below each chart indicate the median and mean mutation numbers. P values and statistical for comparison of scores between groups are indicated within the chart.

**a TCGA genes in DCB**

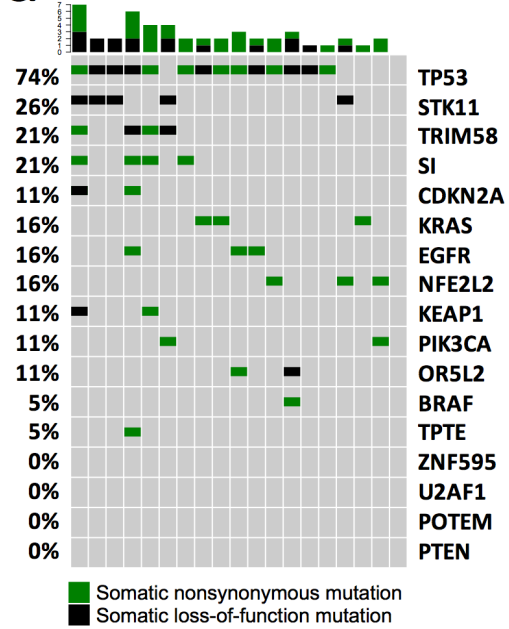

**b TCGA genes in NDB**

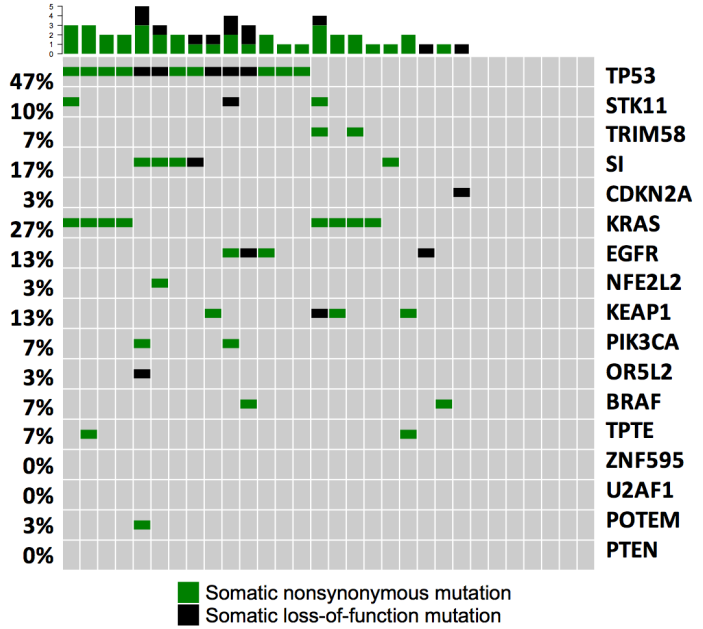

**Supplementary Figure 2. Association between mutations in cancer-related genes from TCGA and sensitivity to immune checkpoint blockers in NSCLC.** a-b) Graphical representation and frequency of nonsynonymous mutations in cancer-related genes of patients with NSCLC treated with immune checkpoint blockers with durable clinical benefit (DCB, a) or with no durable benefit after treatment (NDB, b). Green boxes indicate nonsynonymous mutations and black boxes indicate variants predicted to induce loss of function.

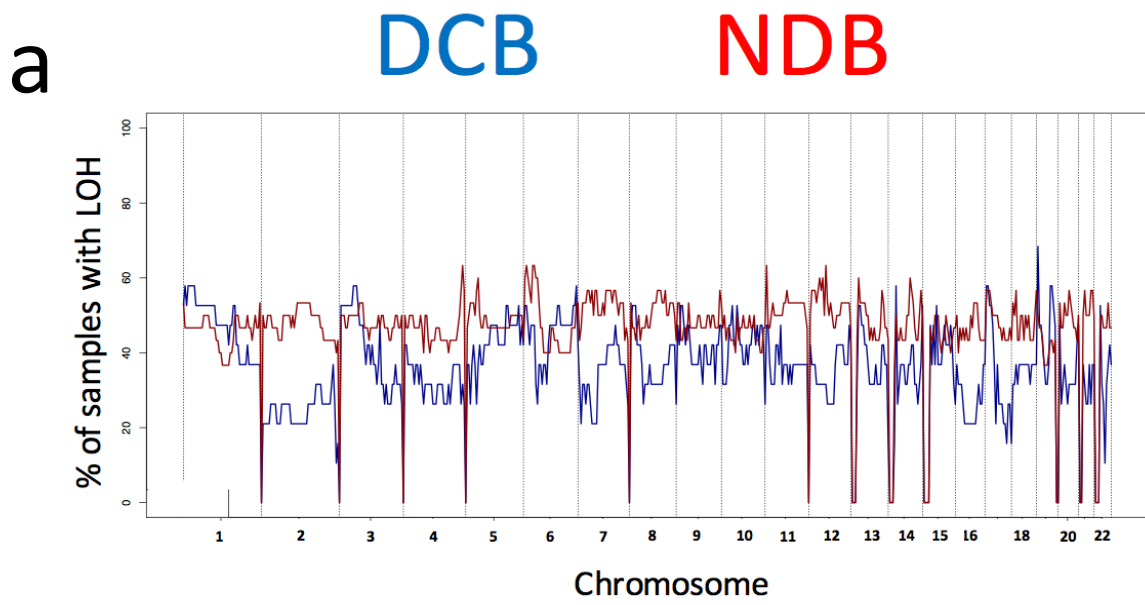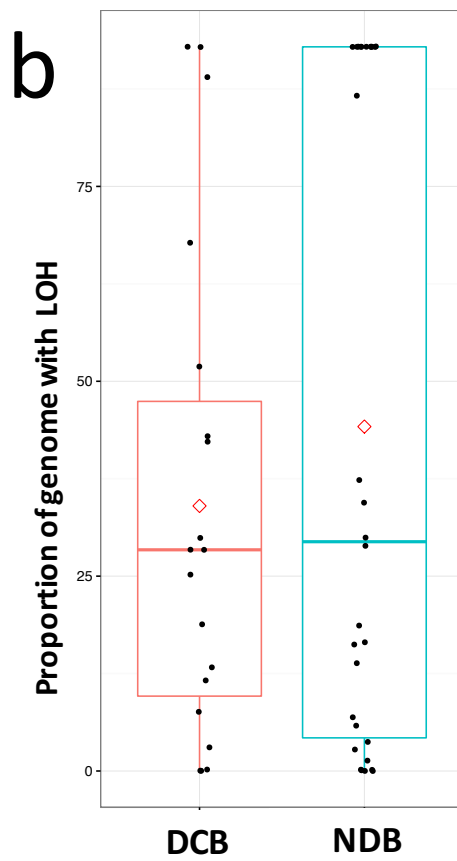

|            | Median | Mean  |
|------------|--------|-------|
| <b>DCB</b> | 28.38  | 34.01 |
| <b>NDB</b> | 29.42  | 44.18 |

**Supplementary Figure 3. Association between loss of heterozygosity (LOH) and response to immune checkpoint blockers in NSCLC.** a) Graphical representation and frequency of LOH by chromosome in patients with NSCLC treated with immune checkpoint blockers with durable clinical benefit (DCB, blue line) or with no durable benefit after treatment (NDB, red line). b) Box plots showing the proportion of the genome with LOH in cases with durable clinical benefit (DCB) and no durable benefit (NDB) from the cohort. Boxes indicate the 25-75% scores and diamonds indicate mean values. Tables below each chart indicate the median and mean LOH proportion. Difference between the groups was not statistically significant ( $P=0.5216$ , Wilcoxon rank sum test). The error bars indicate the standard deviation.

Copy Number Variation and response to immune checkpoint blockers in NSCLC

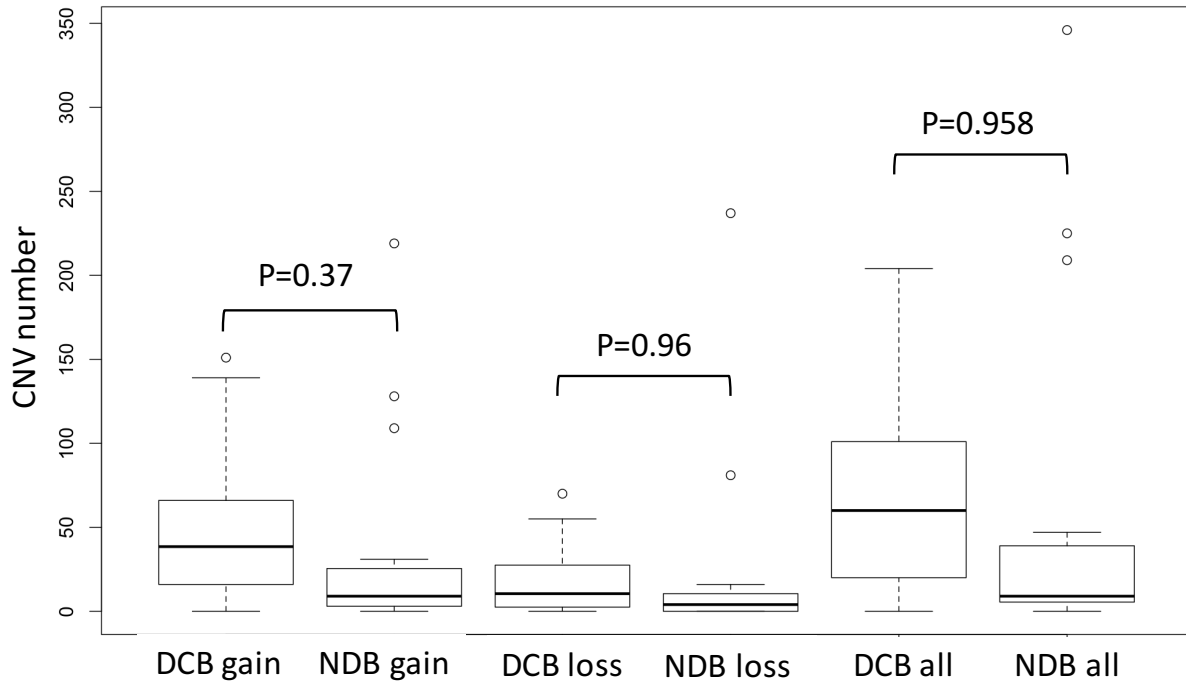

**Supplementary Figure 4. Association between genetic copy number variation (CNV) and response to immune checkpoint blockers in NSCLC.** Graphical representation of the number of loci with CNV across the exome in patients with NSCLC treated with immune checkpoint blockers with durable clinical benefit (DCB) or with no durable benefit after treatment (NDB). Cases were stratified based on copy number gains and losses. Difference between the groups was not statistically significant using the Wilcoxon rank sum test and P values are indicated within the chart. The error bars indicate the standard deviation.

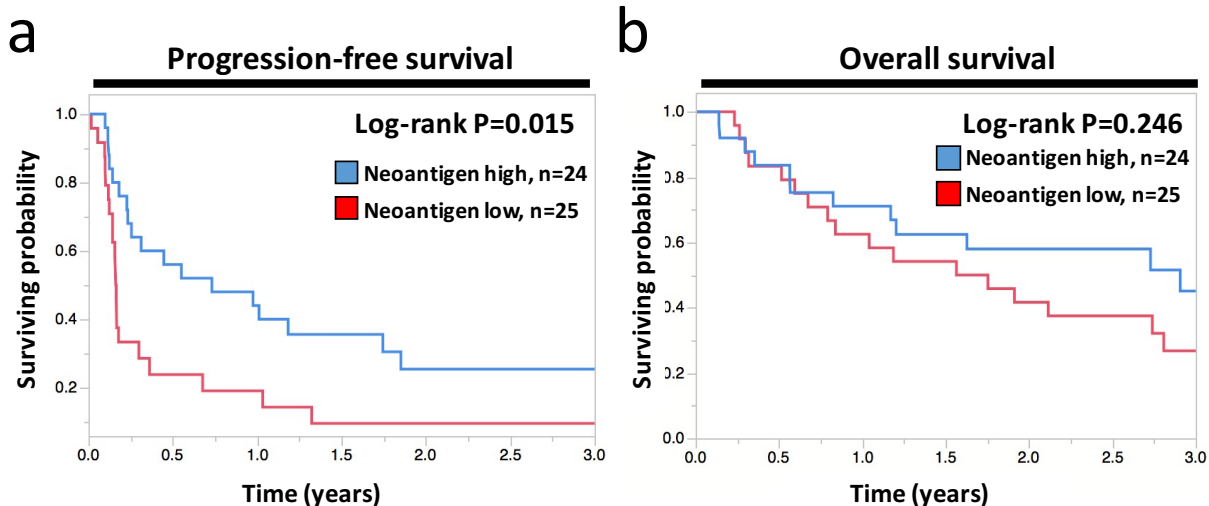

**Supplementary Figure 5. Association between the level of candidate MHC-class I neoantigens and survival in NSCLC patients treated with immune checkpoint blockers.** a- b) Kaplan-Meier graphical analysis of the 3-year progression-free survival (a) and overall survival (b) of NSCLC patients after treatment with immune checkpoint blockers. The median candidate MHC class-I neoantigen number was used as stratification cut point. The number of cases in each group and log-rank P value are indicated within each chart.

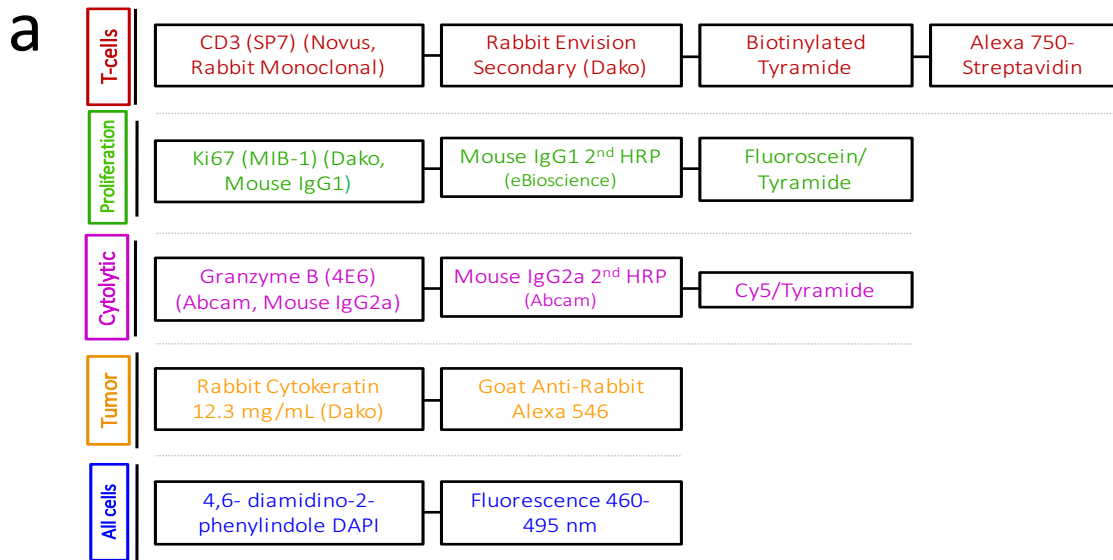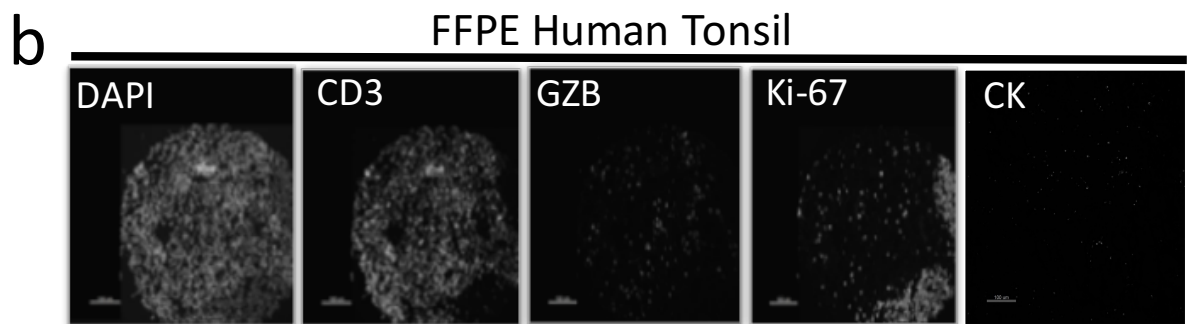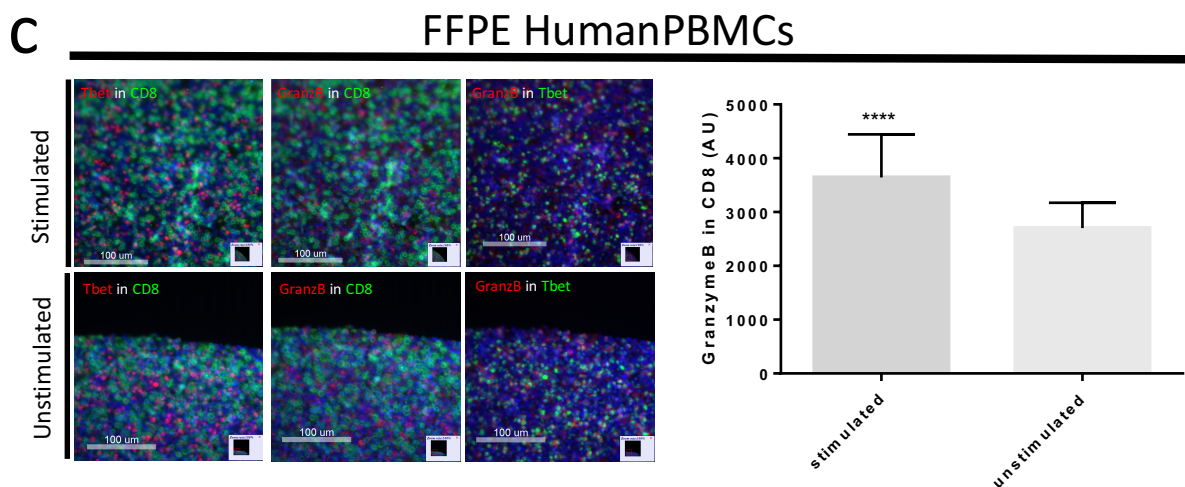

**Supplementary Figure 6. Validation of a 5-color multiplex quantitative fluorescence assay to measure T-cell infiltration proliferation and cytolytic activity in NSCLC.** a) Schema showing the primary, secondary and specific fluorophores used to stain the multiplexed panel



including markers for all cells in the sample (DAPI, blue), epithelial tumor cells (cytokeratin, yellow), T-lymphocytes (CD3, red), cell proliferation (Ki-67, green) and cytolytic granules (Granzyme-B, magenta). b) Localized expression of each of the markers in the panel in FFPE samples from human tonsil. c) Simultaneous staining of Tbet, CD8 and Granzyme-B in FFPE samples from unstimulated peripheral human PBMCs or PBMCs stimulated for 72h with anti CD3 (clone OKT3) and CD28 (clone CD28.2) antibodies. The chart on the right shows the level of Granzyme-B measured in each sample using quantitative immunofluorescence. The results shows the average of at least 10-20x fields of view in 3 individual experiments. The bars indicate the S.E.M. \*\*\*\*= $P < 0.0001$  using the Mann-Whitney test.

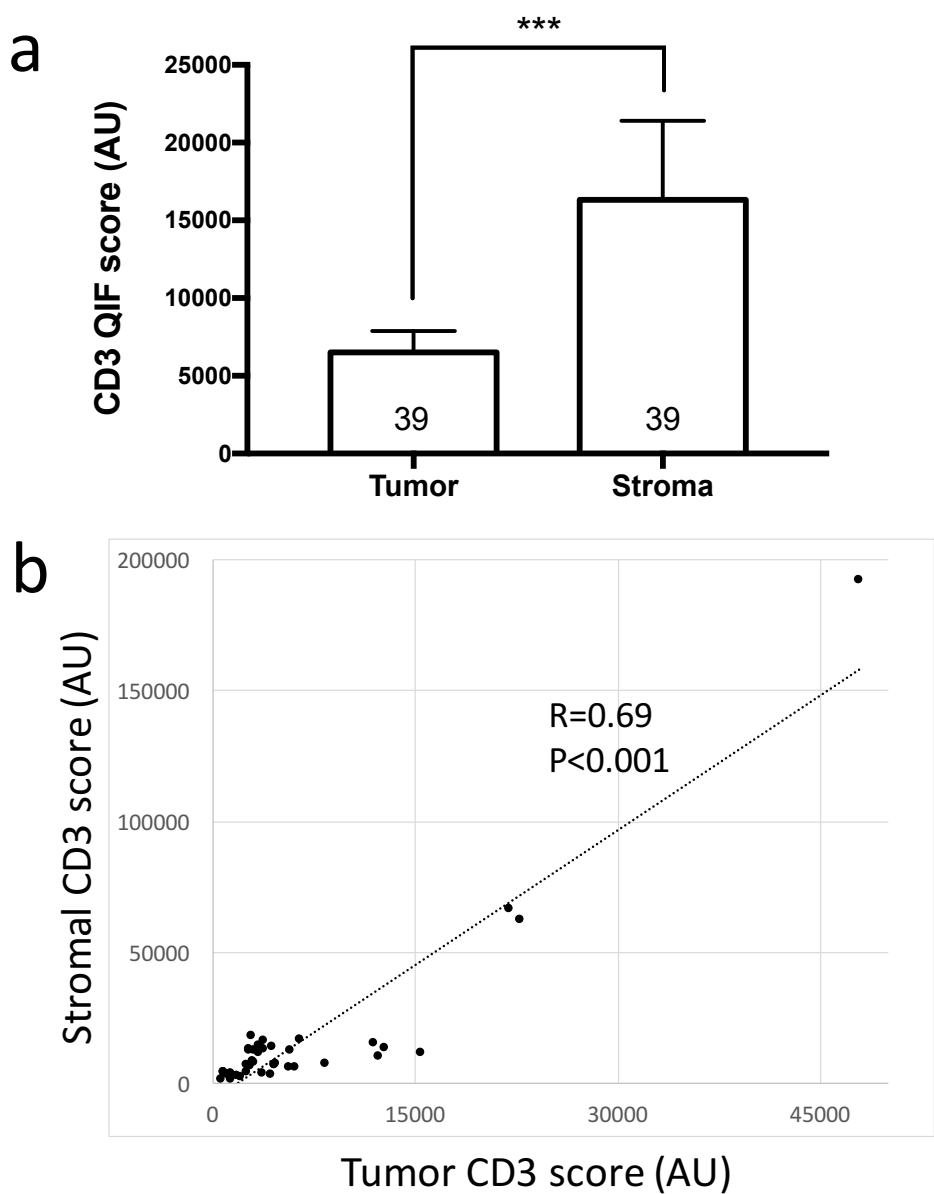

**Supplementary Figure 7. Association between the level of CD3 in the tumor and stroma of NSCLC samples.** a) Bar chart showing the level of CD3 selectively measured by QIF in the cytokearatin-positive tumor area and in the cytokearating-negative stromal compartment. The number of cases in each group is indicated within the bars. Error bars indicate the S.E.M. \*\*\*= $P < 0.001$  uwing the Mann-Whitney test. b) Correlation between the level of CD3 in the cytokearatin-positive tumor area and cytokearatin-negative tumor compartment using QIF in FFPE preparations from NSCLC. R indicates the Spearman correlation coefficient and associated P value.

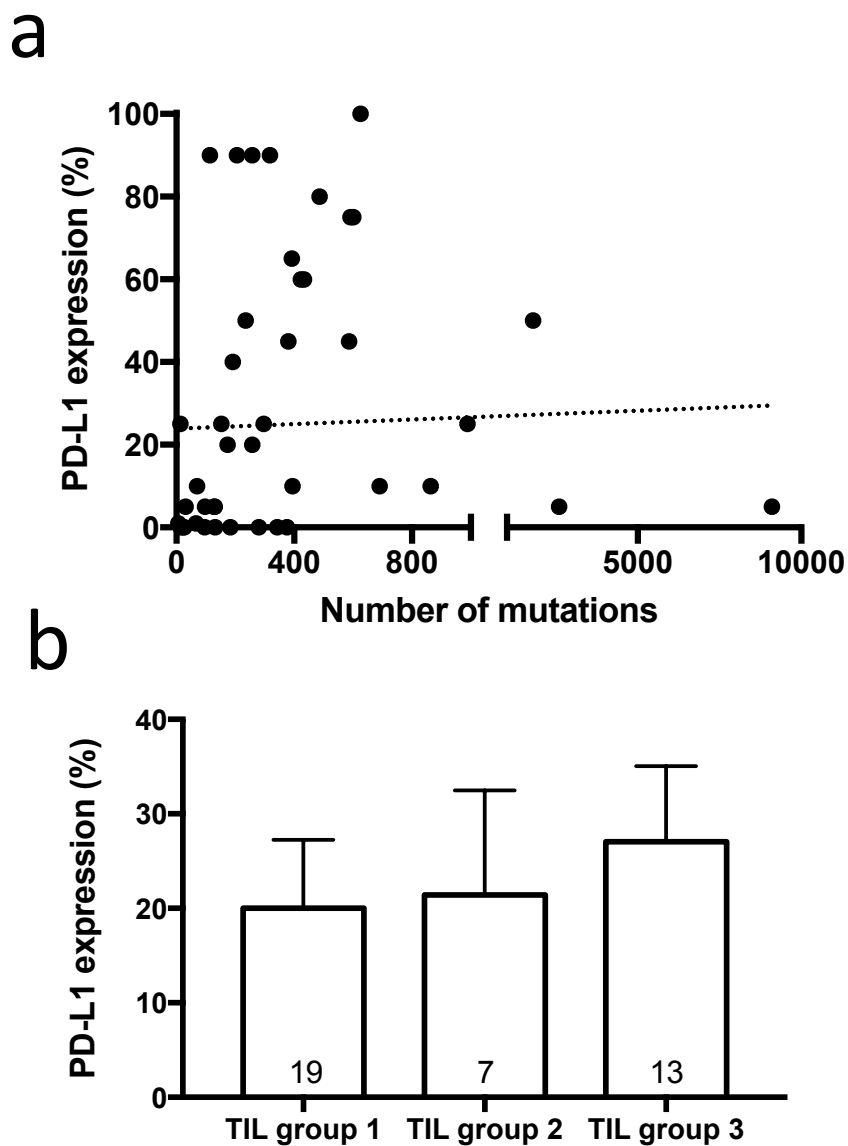

**Supplementary Figure 8. Association between the mutational load, TILs subgroups and PD-L1 expression in NSCLC.** a) Correlation between the number of nonsynonymous mutations and percentage of tumor PD-L1 expression in NSCLC cases from the cohort. b) Proportion of tumor cells positive for PD-L1 in NSCLC cases stratified by TIL groups. The number of cases in each group is indicated within the bars. Error bars indicate S.E.M. The difference between the groups was not statistically significant ( $P > 0.05$ , one way ANOVA).

**a** Lung Adenocarcinomas TCGA

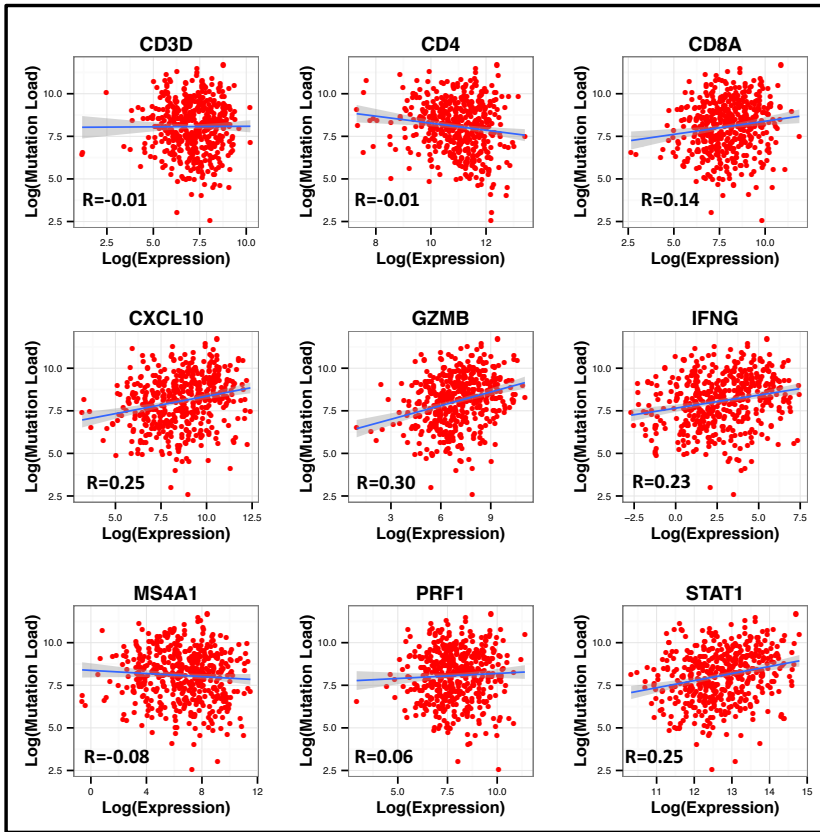

**b** Lung Squamous TCGA

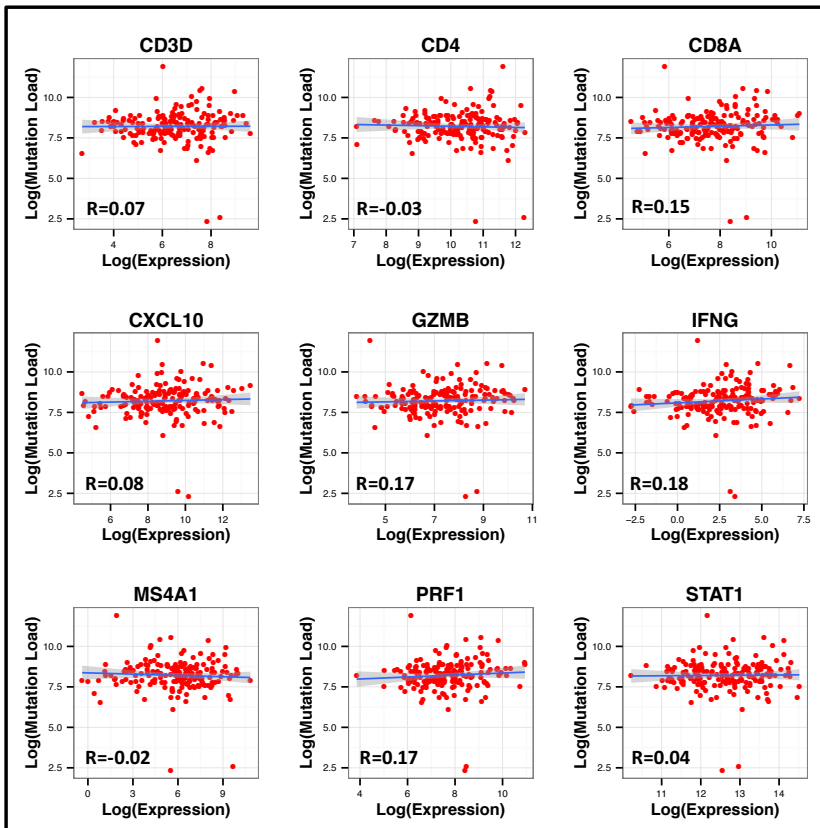

**Supplementary Figure 9. Association between the mutational load and expression of diverse immune-related transcripts in NSCLC cases from TCGA.** a-b) Charts showing the correlation between the number of somatic DNA mutations and the expression levels of diverse immune transcripts in lung adenocarcinomas (a) or in lung squamous cell carcinomas (b) from the TCGA cohort. The Spearman's correlation coefficient for each markers is indicated withing the charts. The number of mutations and transcript levels were log<sub>2</sub> transformed.

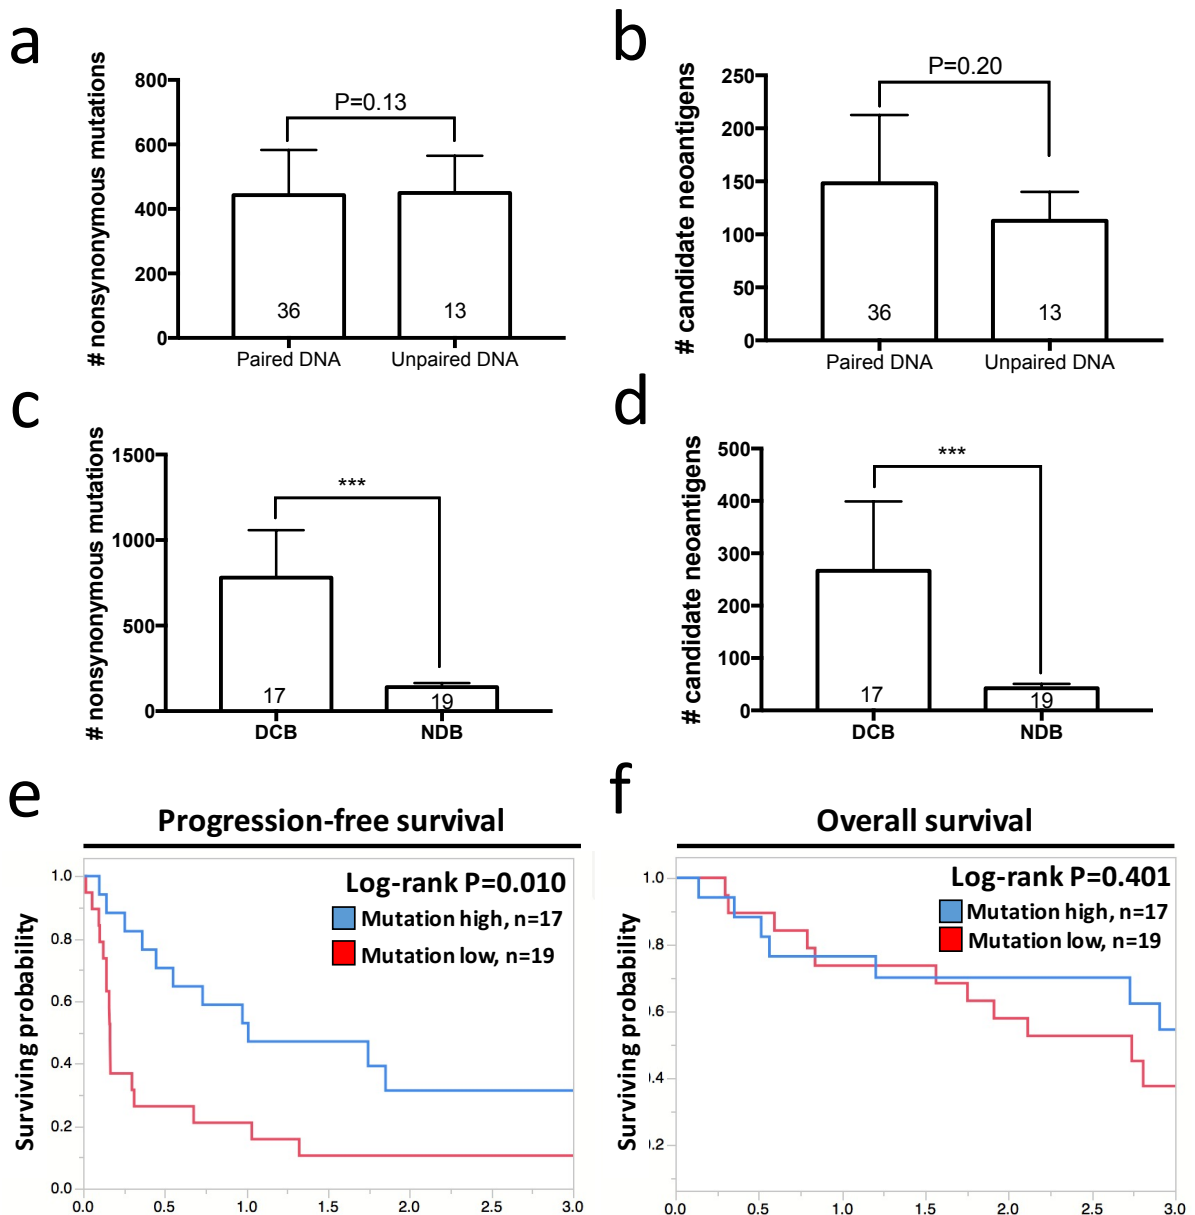

**Supplementary Figure 10. Association between the mutational load, candidate MHC class-I neoantigens and outcome in NSCLC cases with paired germline/tumor DNA and excluding cases with unpaired DNA samples. a-b) Charts showing the number of nonsynonymous mutations (a) and candidate MHC class-I neoantigens (b) in cases with matched**

germline DNA (paired DNA) and without available germline DNA (unpaired DNA). Error bars indicate S.E.M. The P value obtained using the Mann-Whitney test is indicated within the charts.

c-d) Association between the mutational load (c) and predicted MHC class-I neoantigens (d) with durable clinical benefit (DCB) and no durable benefit (NDB) to immune checkpoint blockade in the cohort after excluding cases lacking paired germline DNA for the analysis. The number of cases in each group is indicated in each bar. Error bars indicate S.E.M. \*\*\*= $P < 0.001$ , Mann-Whitney test.

(e-f) Association between the mutational load and 3-year progression-free survival (e) and overall survival (f) after treatment with immune checkpoint blockers excluding cases lacking paired germline DNA. The median mutational number was used as stratification cut point. The number of cases in each group and log-rank P value are indicated within each chart.

**Supplementary Table 1. Level of strong, intermediate and weak candidate MHC class-I neoantigens in the NSCLC cohort of patients treated with immune checkpoint blockers.**

|        | <b>Neoantigen (n=49)</b> |                                                 |                                                                               |                                                                           |
|--------|--------------------------|-------------------------------------------------|-------------------------------------------------------------------------------|---------------------------------------------------------------------------|
|        | <b>Total</b>             | <b>Strong<br/>(<math>\leq 50</math><br/>nM)</b> | <b>Intermediate<br/>(<math>&gt; 50</math> &amp; <math>\leq 150</math> nM)</b> | <b>Weak<br/>(<math>&gt;150</math> &amp; <math>\leq 500</math><br/>nM)</b> |
| Median | 72                       | 16                                              | 20                                                                            | 34                                                                        |
| Mean   | 138.78                   | 35.94                                           | 37.14                                                                         | 65.69                                                                     |



**Supplementary Table 2.. Clinico-pathologic characteristics of the cases in the NSCLC cohort treated with immune checkpoint blockers**

| <b>Characteristic</b>                                              | <b>Number (%)</b> |
|--------------------------------------------------------------------|-------------------|
| <b>Age</b>                                                         |                   |
| ≥70                                                                | 16 (33)           |
| <70                                                                | 33 (67)           |
| Median                                                             | 65 years          |
| <b>Gender</b>                                                      |                   |
| Male                                                               | 25 (51)           |
| Female                                                             | 24 (49)           |
| <b>Race/Ethnicity</b>                                              |                   |
| White                                                              | 44 (90)           |
| Black                                                              | 1 (2)             |
| Asian                                                              | 2 (4)             |
| Hispanic                                                           | 2 (4)             |
| <b>Smoking History</b>                                             |                   |
| Never Smoker                                                       | 6 (12)            |
| < 1 Pack Year                                                      | 3 (6)             |
| 1 to 5 Pack Year                                                   | 3 (6)             |
| >5 to 10 Pack Year                                                 | 1 (2)             |
| >10 to 15 Pack Year                                                | 3 (6)             |
| >15 to 20 Pack Year                                                | 7 (14)            |
| >10 Pack Year                                                      | 26 (53)           |
| <b>Tumor Histology</b>                                             |                   |
| Adenocarcinoma                                                     | 33 (67)           |
| Squamous carcinoma                                                 | 10 (20)           |
| Adenosquamous                                                      | 1 (2)             |
| Poorly Differentiated                                              | 5 (10)            |
| <b>Oncogenic mutation</b>                                          |                   |
| EGFR mutant                                                        | 8 (16)            |
| KRAS mutant                                                        | 11 (22)           |
| <b>Stage at Diagnosis</b>                                          |                   |
| I                                                                  | 4 (8)             |
| II                                                                 | 9 (18)            |
| III                                                                | 13 (27)           |
| IV                                                                 | 23 (47)           |
| <b>Tumor Sample Site</b>                                           |                   |
| Primary                                                            | 19 (39)           |
| Metastatic, Lymph Node                                             | 14 (28)           |
| Metastatic, Non- Lymph Node                                        | 16 (33)           |
| <b>Sample Type</b>                                                 |                   |
| Biopsy                                                             | 21 (43)           |
| Resection                                                          | 28 (57)           |
| <b>Time from Tumor Collection to ICB treatment</b>                 |                   |
| ≤ 4 weeks                                                          | 8 (16)            |
| > 4 weeks to 8 weeks                                               | 6 (12)            |
| > 8 weeks to 24 weeks                                              | 5 (10)            |
| > 24 weeks to 1 year                                               | 8 (16)            |
| > 1 year to 2 years                                                | 12 (25)           |
| > 2 to 3 years                                                     | 6 (12)            |
| > 3 years                                                          | 4 (8)             |
| Median                                                             | 9 months          |
| <b>Systemic therapy Between Tumor Collection and ICB treatment</b> |                   |
| Yes                                                                | 29 (59)           |
| No                                                                 | 20 (41)           |
| <b>ICB Treatment</b>                                               |                   |
| PD-1 blockade                                                      | 29 (59)           |
| PD-L1 blockade                                                     | 12 (25)           |
| PD-1 and CTLA-4 blockade                                           | 7 (14)            |
| PD-1 and Erlotinib*                                                | 1 (2)             |
| <b>Prior Systemic Therapy</b>                                      |                   |
| None                                                               | 7 (14)            |
| 1 Line                                                             | 17 (35)           |
| 2 Lines                                                            | 6 (12)            |
| 3+ Lines                                                           | 19 (39)           |
| <b>Prior Radiation</b>                                             |                   |
| Yes                                                                | 33 (67)           |
| No                                                                 | 16 (33)           |

\* After progression on erlotinib as last line of therapy  
ICB=Immune checkpoint blocker

**Supplementary Table 3. Clinico-pathologic characteristics of the cases in the NSCLC cohort not treated with immune checkpoint blockers.**

| <b>Characteristic</b> | <b>Number (%)</b> |
|-----------------------|-------------------|
| <b>Age (Years)</b>    |                   |
| < 70                  | 59 (54.6%)        |
| ≥ 70                  | 49 (45.4%)        |
| <b>Gender</b>         |                   |
| Male                  | 55 (50.9%)        |
| Female                | 53 (49.1%)        |
| <b>Smoking Status</b> |                   |
| Never                 | 6 (5.6%)          |
| Smoker                | 102 (94.4%)       |
| Unknown               | 0 (0.0%)          |
| <b>Histology</b>      |                   |
| Adenocarcinoma        | 62 (57.4%)        |
| Squamous              | 23 (21.3%)        |
| Other                 | 23 (21.3%)        |
| <b>Stage</b>          |                   |
| 0                     | 8 (7.4%)          |
| I-II                  | 71 (65.7%)        |
| III-IV                | 29 (26.9%)        |
| Unknown               | 0 (0.0%)          |

**Supplementary Table 4. Targets, antibodies and metal labels used in the mass cytometry analysis.**

| Chanel | Metal | Target       | Clone    | Vendor         | #catalog   | Volume** |
|--------|-------|--------------|----------|----------------|------------|----------|
| 141    | Pr    | HLA-ABC      | W6-32    | FDM            | 3141010B   | 1        |
| 142    | Nd    | CD19         | HIB19    | FDM            | 3142001B   | 0.5      |
| 143    | Nd    | CD127        | A019D5   | FDM            | 3143012B   | 1        |
| 144    | Nd    | CD69         | FN50     | FDM            | 3144018B   | 1        |
| 145    | Nd    | CD28         | CD28.2   | Biologend*     | 302902     | 1.5      |
| 146    | Nd    | CD8a         | RPA-T8   | FDM            | 3146001B   | 0.3      |
| 147    | Sm    | CD11c        | Bu15     | FDM            | 3147008B   | 1        |
| 148    | Nd    | CD16         | 3G8      | FDM            | 3148004B   | 1        |
| 149    | Sm    | CD45RO       | UCHL1    | FDM            | 3149001B   | 1.5      |
| 150    | Nd    | LAG3         | 11C3C65  | FDM            | 3150030B   | 1        |
| 151    | Eu    | CD14         | M5E2     | FDM            | 3151009B   | 1.5      |
| 152    | Sm    | TCRgd        | 11F2     | FDM            | 3152008B   | 2        |
| 153    | Eu    | CCR4         | L291H4   | FDM            | 3153030A   | 0.3      |
| 154    | Sm    | CD45RA       | HI100    | Biologend*     | 304143     | 1        |
| 156    | Gd    | PD-L1        | 29E.2A3  | FDM            | 3156026B   | 1        |
| 158    | Gd    | CD137        | BBK2     | Thermo Sci*    | MA5-13739  | 0.1      |
| 159    | Tb    | CCR7         | G043H7   | FDM            | 3159003A   | 1.5      |
| 160    | Gd    | Tbet         | 4B10     | FDM            | 3160010B   | 0.5      |
| 161    | Dy    | BCLXL        | 7B2.5    | EM Millipore*  | MAB3121    | 1        |
| 162    | Dy    | Foxp3        | PCH101   | FDM            | 3162024A   | 1        |
| 163    | Dy    | CXCR3        | G025H7   | FDM            | 3163004B   | 1        |
| 164    | Dy    | FAS (CD95)   | DX2      | FDM            | 3164008B   | 1        |
| 165    | Ho    | EOMES        | WD1928   | Thermo Fisher* | 14-4877-80 | 1        |
| 166    | Er    | TIM-3        | D5D5R    | Cell Sig Tech* | 45208S     | 1        |
| 167    | Er    | Gata3        | TWAJ     | FDM            | 3167007A   | 0.1      |
| 168    | Er    | Ki-67        | Ki-67    | FDM            | 3168001B   | 0.5      |
| 169    | Tm    | CD25 (IL-2R) | 2A3      | FDM            | 3169003B   | 0.5      |
| 170    | Er    | CD3          | UCHT1    | FDM            | 3170001B   | 1.5      |
| 171    | Yb    | Granzyme B   | GB11     | FDM            | 3171002B   | 0.3      |
| 172    | Yb    | mCD11b       | M1/70    | FDM            | 3172012B   | 0.5      |
| 173    | Yb    | HLA-DR       | L243     | FDM            | 3173005B   | 1        |
| 174    | Yb    | CD4          | SK3      | FDM            | 3174004B   | 0.2      |
| 175    | Lu    | PD-1         | EH12.2H7 | FDM            | 3175008B   | 1        |
| 176    | Yb    | CD56         | NCAM16.2 | FDM            | 3176008B   | 0.3      |
| 209    | Bi    | CD11b        | ICRF44   | FDM            | 3209003B   | 0.5      |
| 89     | Y     | CD45         | HI30     | FDM            | 3089003B   | 2        |

**Supplementary Table 5. Multivariable Cox model of the survival effect of mutational burden, PD-L1 expression and TIL groups.**

| <b>Variable</b> | <b>Risk Ratio [CI]</b> | <b>P value</b> |
|-----------------|------------------------|----------------|
| Mutation number | 0.89 [0.899-0.999]     | <b>0.046</b>   |
| PD-L1 IHC       | 0.91[0.986-1.016]      | 0.712          |
| QIF group       | 0.581 [0.326-0.981]    | <b>0.039</b>   |

The mutational load/number was stratified into high/low using the median score of the cohort. PD-L1 IHC scores were stratified using 1% tumor proportion score (TPS). The QIF groups were stratified into 3 groups as indicated in the results and methods section. Additional variables such as smoking status and level of CD3+ TILs were not included in the model due to their significant correlation with the mutation load and QIF groups, respectively.
